# Supplementary figures and images for: Elasto-inertial instabilities in the merging flow of viscoelastic fluids
Source: Royal Society of Chemistry journal article supplement (doi:10.1039/d4sm00743c), 2024-01-01

# 1M PEO solutions @ 60 ml/h

10 ppm

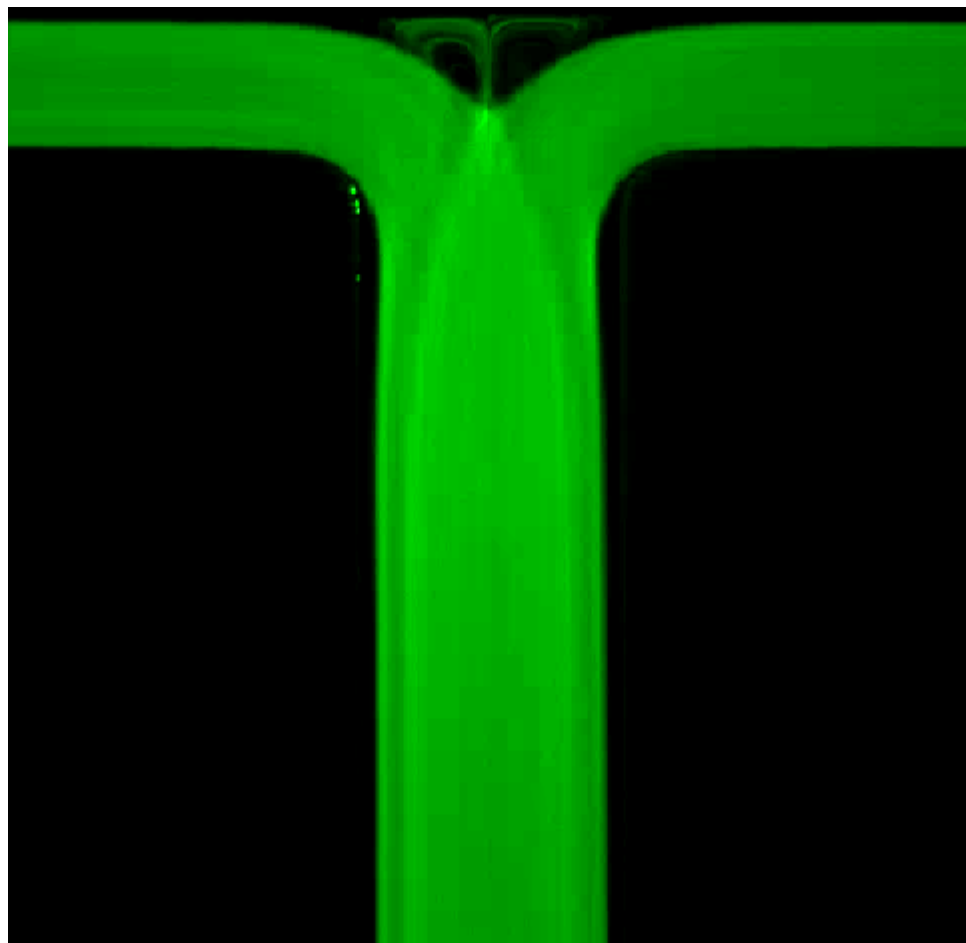

50 ppm

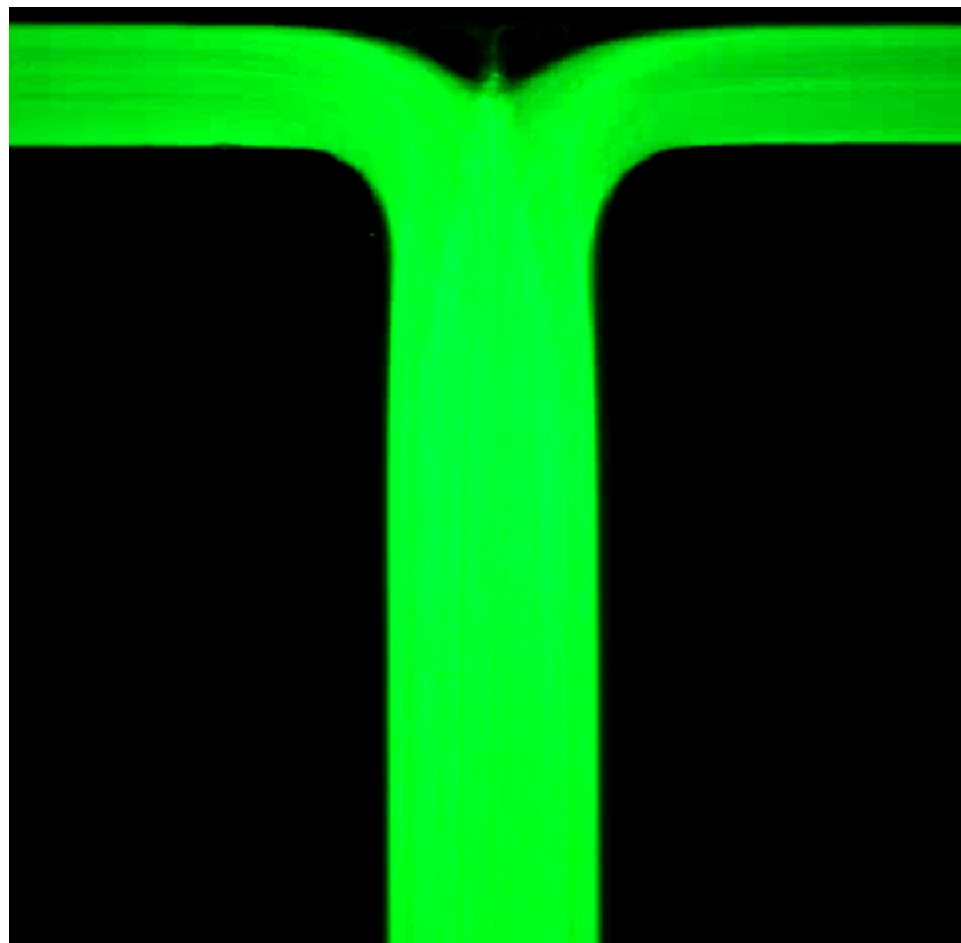

# 1M PEO solutions @ 60 ml/h

300 ppm

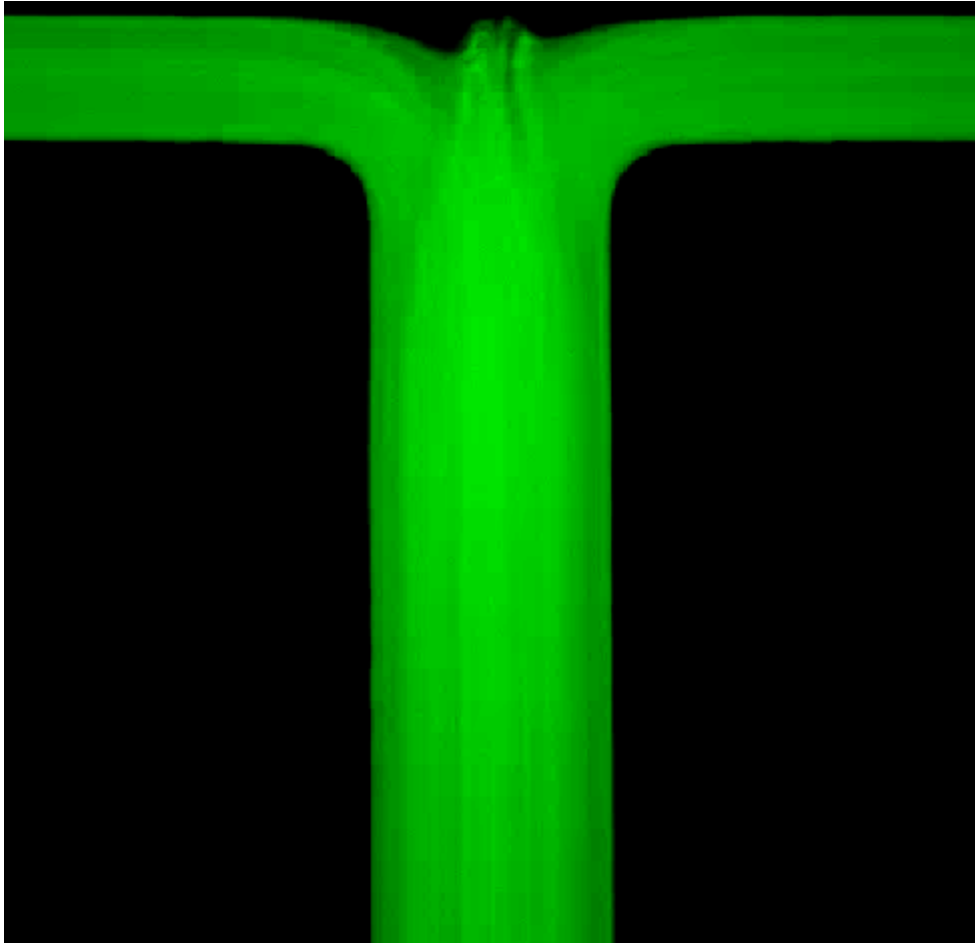

500 ppm

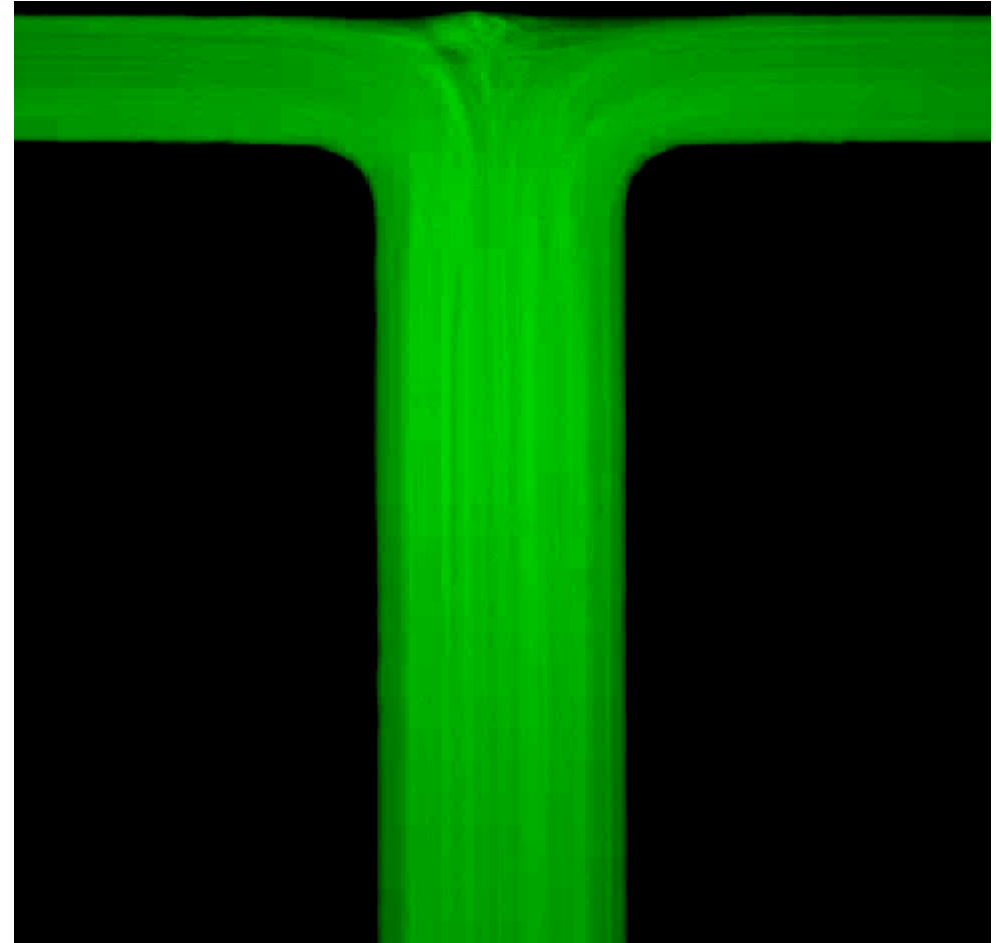

Supplement: d4sm00743c1.pdf [file d4sm00743c1.pdf]

# 1M PEO solutions @ 60 ml/h

10 ppm

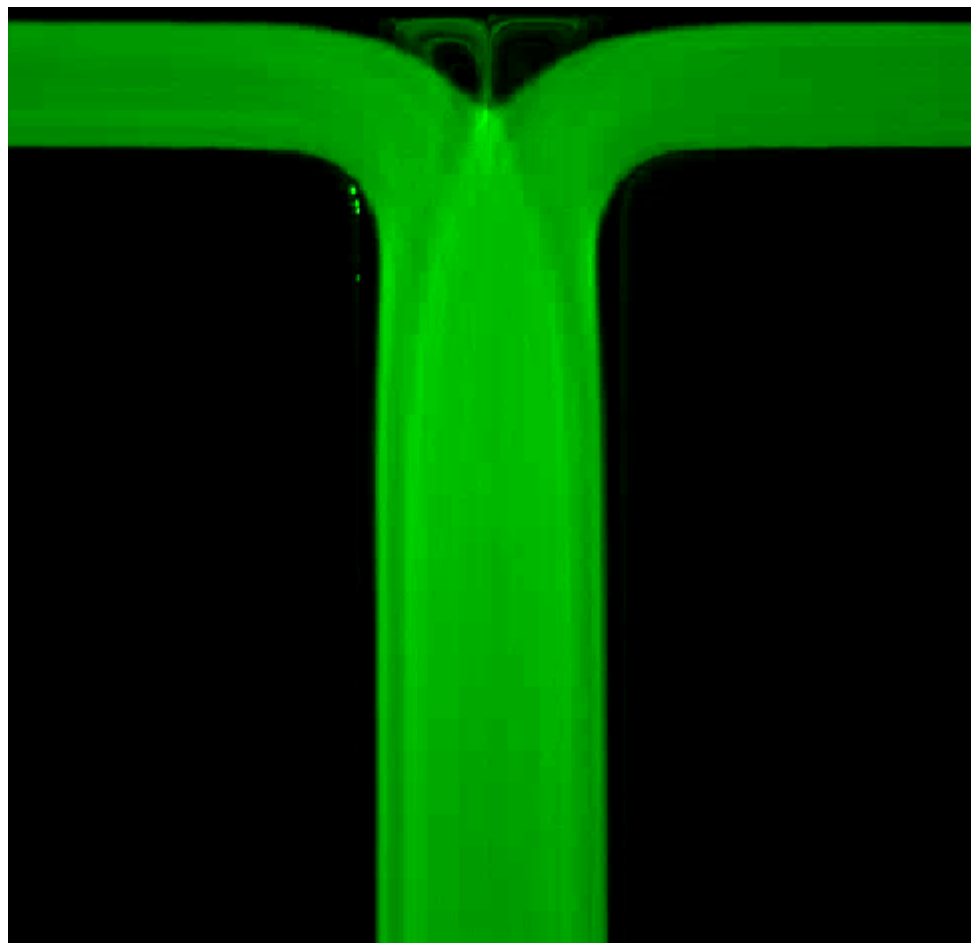

50 ppm

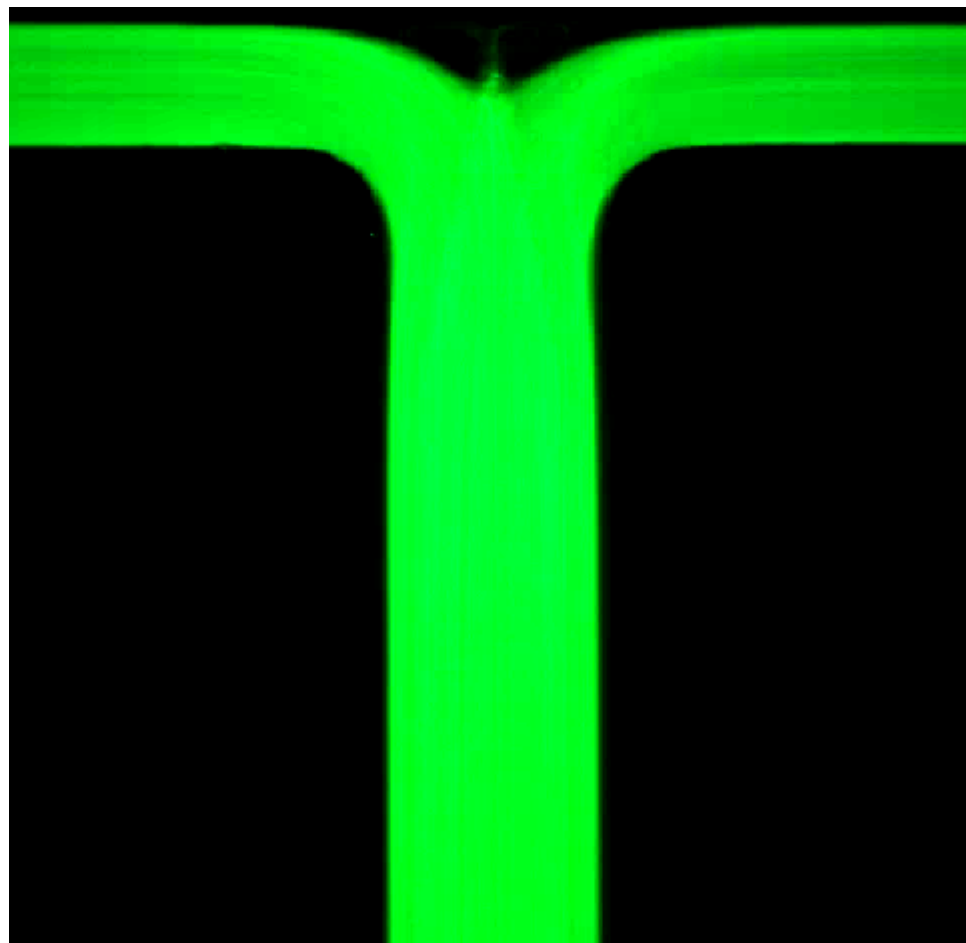

# 1M PEO solutions @ 60 ml/h

300 ppm



500 ppm

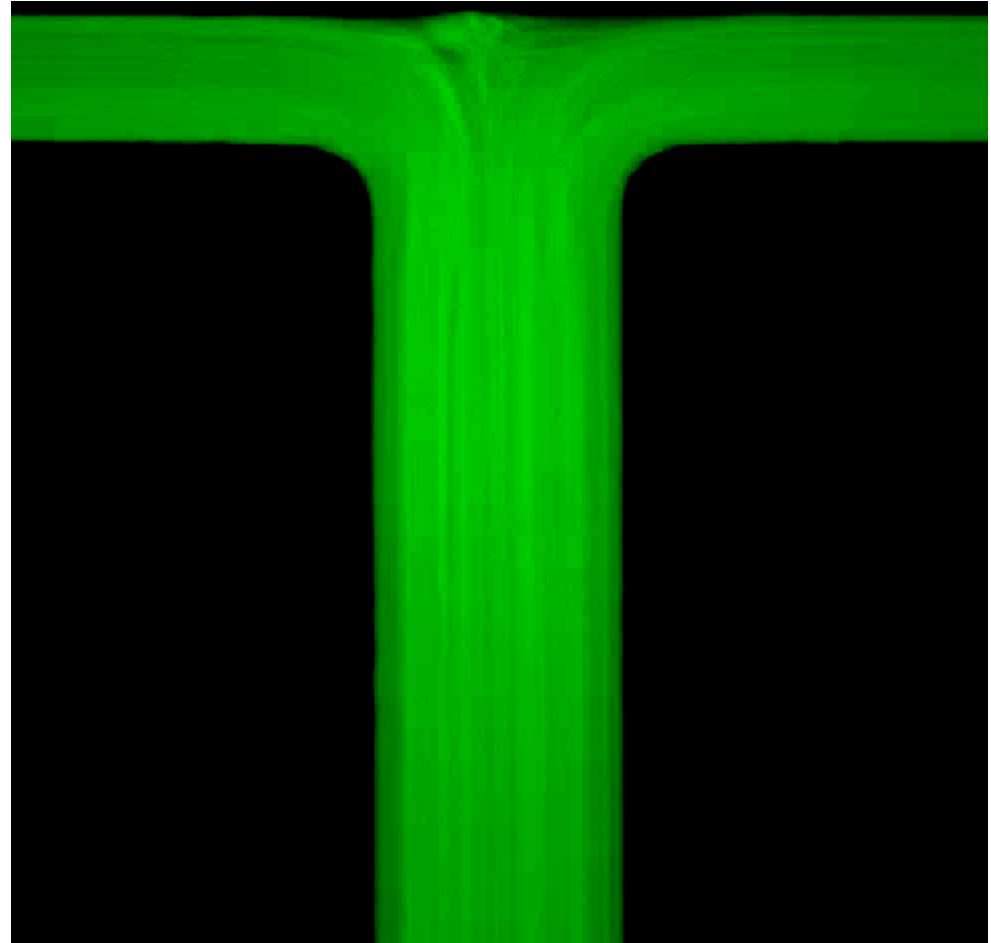

Supplement: d4sm00743c1.pdf [file d4sm00743c1.pdf]
